# Supplementary material for: Retrospective case study on the suitability of mid-infrared microscopic imaging for the diagnosis of mucormycosis in human tissue sections
Source: Royal Society of Chemistry journal article supplement (doi:10.1039/c7ay01132f), 2017-01-01
Supplement: c7ay01132f1.pdf [file c7ay01132f1.pdf]

## 1 Supplementary

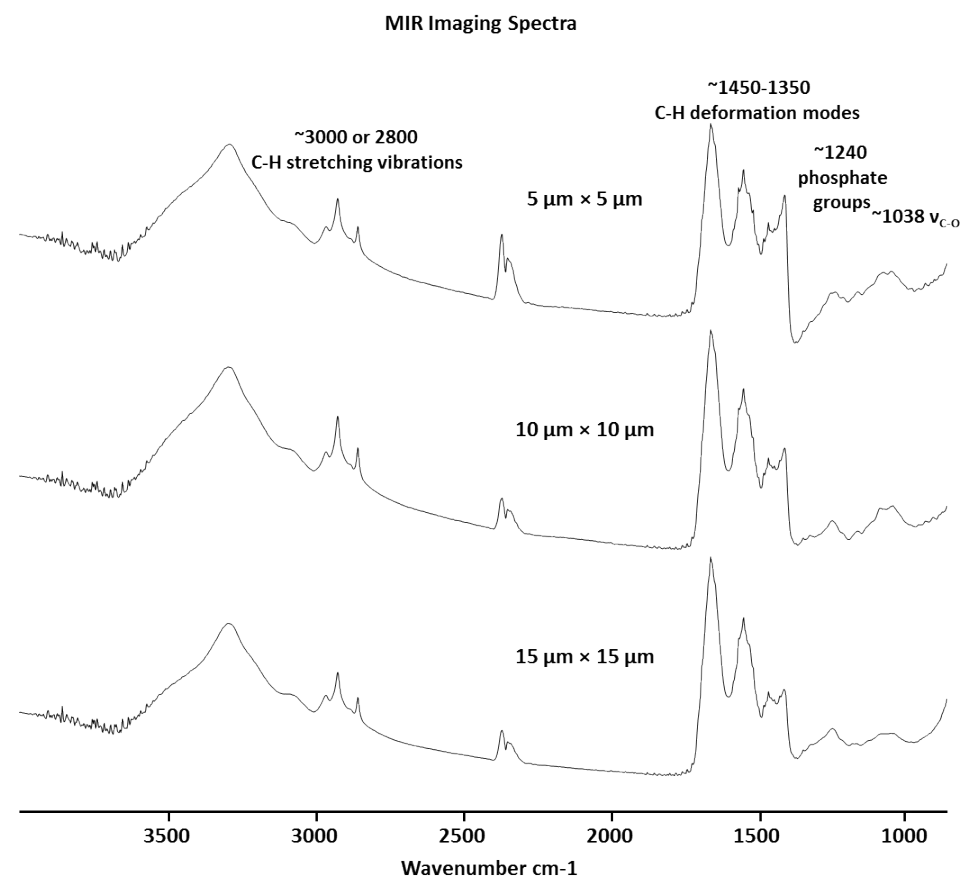

2

3 **Fig. I** Effects of the beam focus on spectra quality. Single spectra are chosen from the same *Mucor*-infected lung tissue region measured with a lateral resolution  
4 of 15.0  $\mu\text{m} \times 15.0 \mu\text{m}$ , 10.0  $\mu\text{m} \times 10.0 \mu\text{m}$  and 5.0  $\mu\text{m} \times 5.0 \mu\text{m}$ . It can be demonstrated, that there is no detrimental effect of the beam focus settings on the

- 5 spectra quality. Spectra demonstrate a slight increase in noise as the aperture size decreases. MIR spectra displayed in the range from 4000  $\text{cm}^{-1}$  to 850  $\text{cm}^{-1}$ .
- 6 Major absorption bands are indicated.

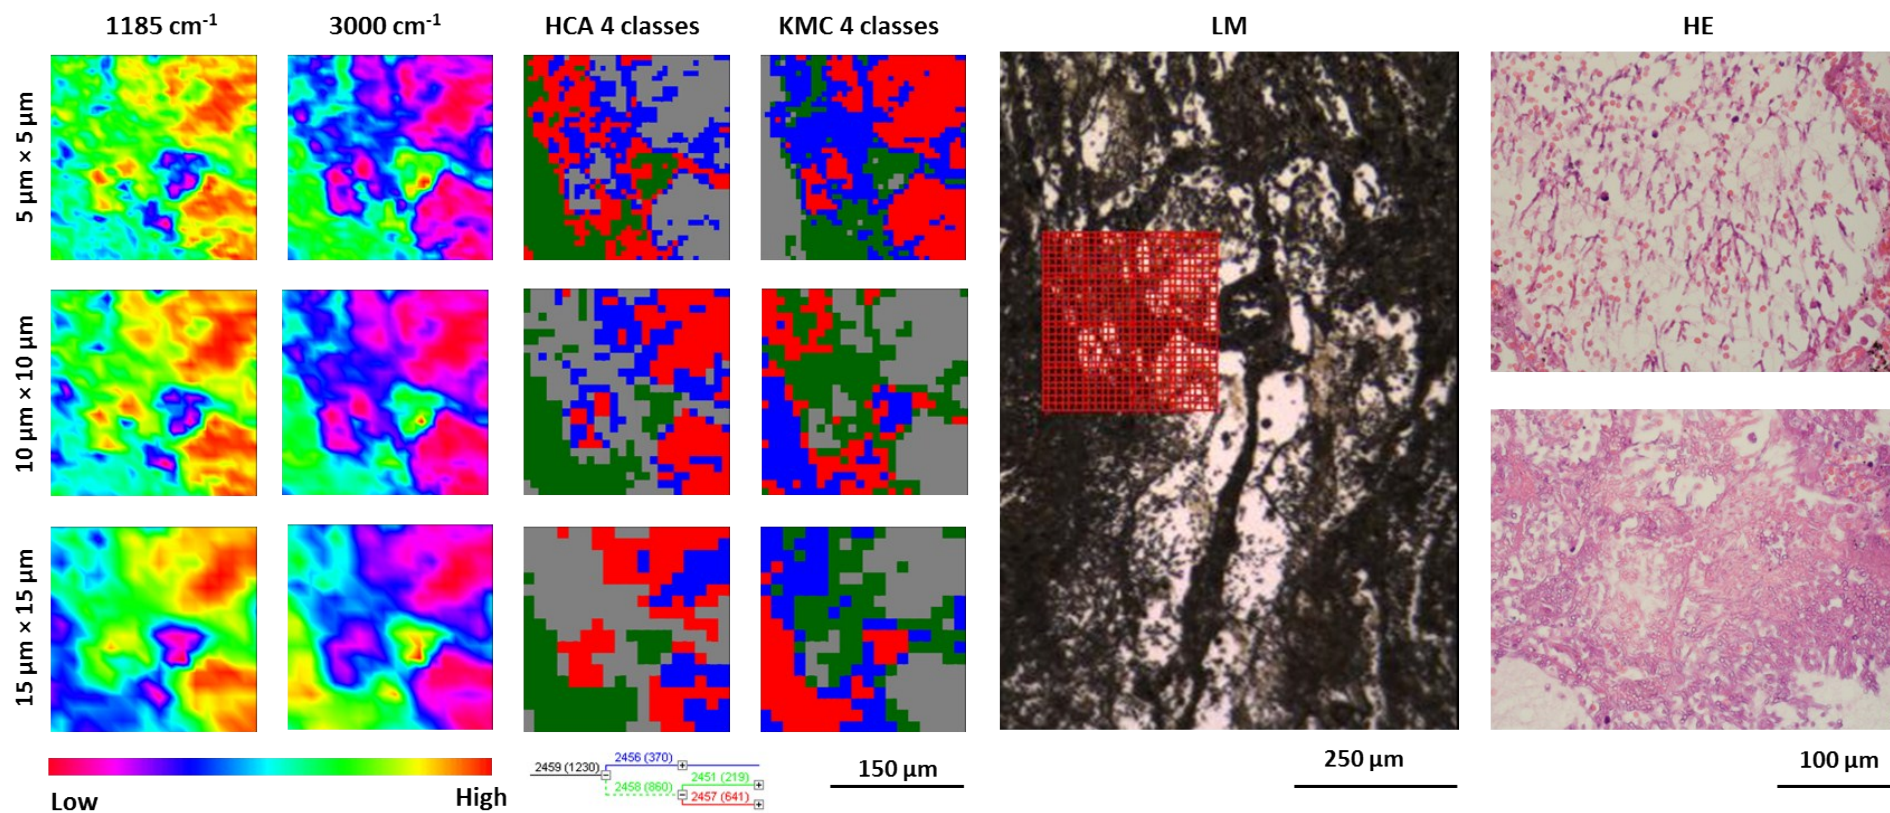

- 7
- 8 **Fig. II** Chemical maps and pseudo-color cluster images generated by multivariate imaging analyses of one individual patient lung tissue sample recorded with
- 9 square apertures of edge sizes: 15.0  $\mu\text{m} \times 15.0 \mu\text{m}$ , 10.0  $\mu\text{m} \times 10.0 \mu\text{m}$  and 5.0  $\mu\text{m} \times 5.0 \mu\text{m}$ . Results illustrate the capability of spectroscopic imaging to
- 10 accurately reproduce tissue histology of the tissue section. Detailed histological features of the tissue section become clearly visible at a 5.0  $\mu\text{m} \times 5.0 \mu\text{m}$  aperture

- 11 sizes. The MIR microscopic imaging results of the given example demonstrate that it is possible to acquire MIR images at aperture size of  $5.0 \mu\text{m} \times 5.0 \mu\text{m}$  and
- 12 that the resolution corresponds with hyphael elements seen in the tissue sample.

14 **Tab.I** Assignment of some characteristic bands in the MIR spectra of *mucormycete*- infected (M) and human tissue (H). Upward arrows indicate strong  
 15 absorption band.

| Wavenumber (cm <sup>-1</sup> ) | Tentative Assignment                                                                                                                                                                   | M | H |
|--------------------------------|----------------------------------------------------------------------------------------------------------------------------------------------------------------------------------------|---|---|
| ~3300                          | protein amide A vibration <sup>17, 62</sup>                                                                                                                                            | ↑ | ↑ |
| ~3000 - 2800                   | C-H stretching vibrations of phospholipids, of protein side chains, nucleic acid sugars, complex carbohydrates as well as that of amorphous or fully hydrated sugars <sup>17, 18</sup> | ↑ |   |
| ~1740                          | $\nu_{C=O}$ esters, phospholipids as well as carbohydrates <sup>50, 63</sup>                                                                                                           | ↑ | ↑ |
| ~1630                          | amide-I proteins <sup>48, 49</sup>                                                                                                                                                     | ↑ | ↑ |
| ~1550                          | amide-II proteins <sup>37, 47</sup>                                                                                                                                                    | ↑ | ↑ |
| ~1515                          | amide-II proteins with high tyrosine content <sup>33, 37, 47</sup>                                                                                                                     | ↑ |   |
| ~1450-1350                     | C-H deformation modes and some carboxylic acid modes <sup>33, 37, 47</sup>                                                                                                             | ↑ | ↑ |
| ~1240                          | phosphate groups of DNA, RNA as well as some phospholipids <sup>44-46</sup>                                                                                                            | ↑ | ↑ |
| ~1185                          | carbohydrate bands <sup>43</sup>                                                                                                                                                       | ↑ |   |
| ~1084                          | $\nu_{P=O}$ symmetric vibrations of the > PO <sub>2</sub> - groups nucleic acids and phospholipids <sup>51-53</sup>                                                                    | ↑ |   |
| ~1060                          | $\nu_{C-O-C}$ symmetric vibrations of phospholipids, cholesterol and esters <sup>50</sup>                                                                                              | ↑ |   |
| ~1038                          | $\nu_{C-O}$ carbohydrates <sup>64, 65</sup>                                                                                                                                            | ↑ |   |

16

17
